# Supplementary material for: N-Terminal Helix-Cap in α-Helix 2 Modulates β-State Misfolding in Rabbit and Hamster Prion Proteins
Source: PubMed Central journal article supplement (PMC3651167; doi:10.1371/journal.pone.0063047), 2013-05-10
Supplement: pone.0063047.s001.pdf [file pone.0063047.s001.pdf]

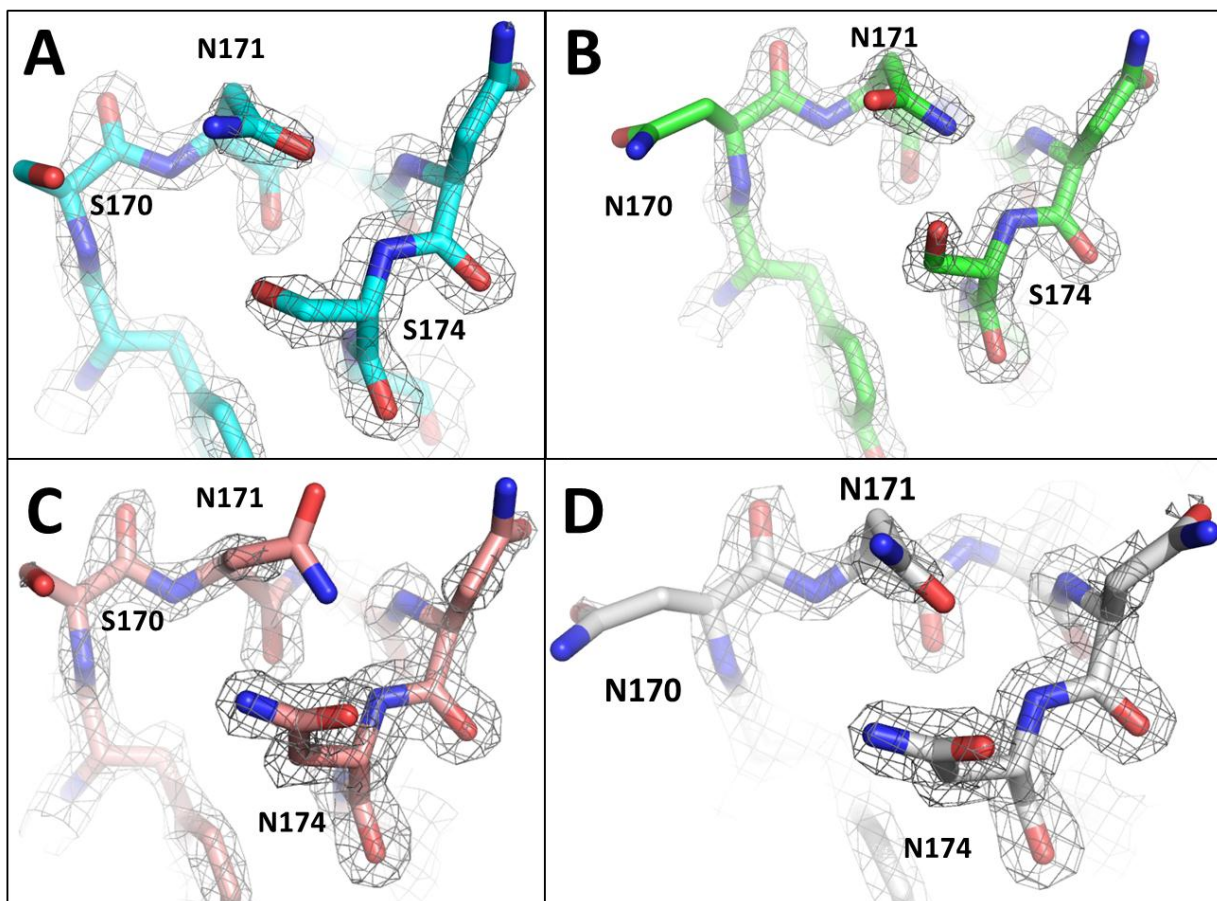

**Figure S1:**  $2F_o - F_c$  electron density map at  $1.5\text{\AA}$  overlaid on the  $\beta_2$ - $\alpha_2$  loops from respective structures of (A) wild-type rabbit PrP<sup>C</sup> 121-230 (B) S170N mutant rabbit PrP<sup>C</sup> 121-230, (C) S174N mutant rabbit PrP<sup>C</sup> 121-230 and (D) S170N/S174N mutant rabbit PrP<sup>C</sup> 121-230.
